# Supplementary material for: Hollow Au loaded with kanamycin for pharmacological and laser-triggered photothermal sterilization
Source: Royal Society of Chemistry journal article supplement (doi:10.1039/c7ra00509a), 2017-01-01
Supplement: c7ra00509a1.pdf [file c7ra00509a1.pdf]

## Supplementary Information

to

### **Hollow Au loading kanamycin for pharmacology and photothermal sterilization triggered by laser**

Xing Zhang<sup>†</sup>, Yuxia Li<sup>‡</sup>, Juhui Qiu<sup>§</sup>, Dandan Zhou<sup>‡</sup>, Minghao Zhang<sup>⊥</sup>, Lan Tang<sup>‡</sup>,

Guoming Xie<sup>\*†</sup> and Hua Xiang<sup>\*†</sup>

<sup>†</sup> Key Laboratory of Laboratory Medical Diagnostics, Chinese Ministry of Education, Department of Laboratory Medicine, Chongqing Medical University, Chongqing, 400016, P R China

<sup>‡</sup> The First Affiliated Hospital of Chongqing Medical University, Chongqing 400016, P R China

<sup>§</sup> State Key Laboratory of Membrane Biology, Tsinghua-Peking Center for Life Sciences, School of Life Sciences, Tsinghua University, Beijing 100084, China

<sup>⊥</sup> Center for Lab Teaching & Management, Chongqing Medical University, Chongqing 400016, P R China

\*Correspondence authors:

Guoming Xie, Key Laboratory of Laboratory Medical Diagnostics, Chinese Ministry of Education, Department of Laboratory Medicine, Chongqing Medical University, No. 1 Yi Xue Yuan Road, Chongqing, 400016, P R China

E-mail address: guomingxie@cqmu.edu.cn

Tel.: +86 23 68485240

Fax.: +86 23 68485239

Hua Xiang, Key Laboratory of Laboratory Medical Diagnostics, Chinese Ministry of Education, Department of Laboratory Medicine, Chongqing Medical University, No.

1 Yi Xue Yuan Road, Chongqing, 400016, P R China

E-mail address: xianghuacq@163.com

Tel.: +86 23 68486109

Fax: +86 23 68485239

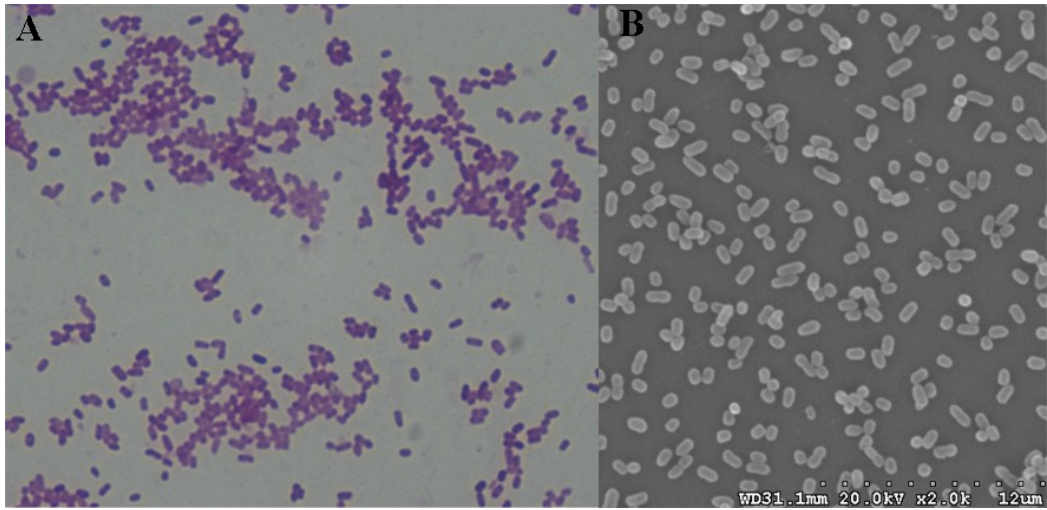

Fig.S1 Gram stain image (A), and SEM image (B) of Escherichia coli.

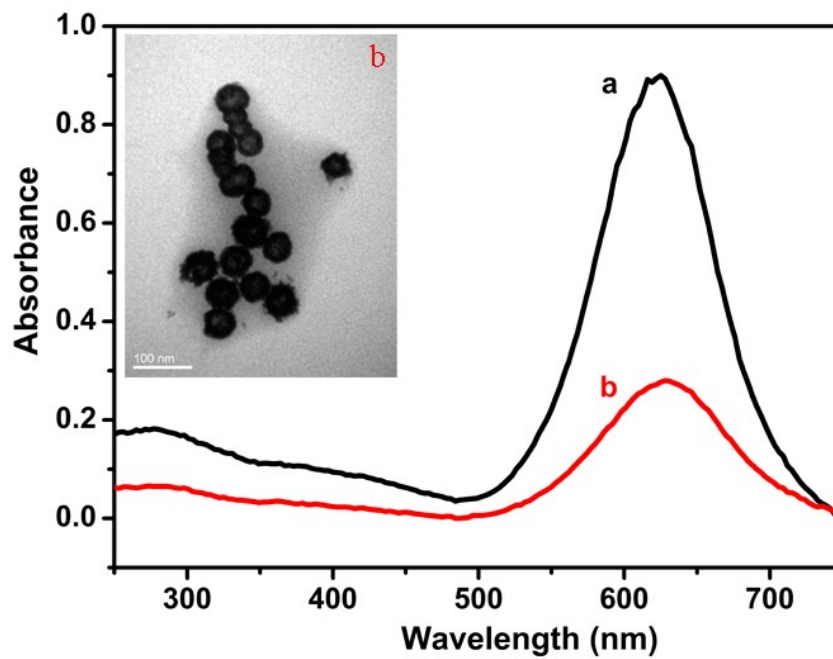

Fig.S2 UV-Vis spectra of (a) fresh prepared and (b) after 70 days stored at 4 °C under dark of hAuNPs.

Illustration is the TEM of hAuNPs corresponding curve (b).

### **How to measure the loading amount of kanamycin on hAuNPs?**

The drug loaded on the hollow nano-carrier material, which can be distributed in cavity carrier, namely internal loading (DI, Drug Inside), the external surface area can also be found in the carrier, namely the external loading (DO, Drug, Outside). Drug dissolution can be divided into two stages of early rapid and late slow dissolution, because the dissolution speed rate of DO is greater than the DI, so it can be generally considered early rapid dissolution period is only affected by the dissolution of DO, and the slow release period only related to DI. A method combining thermogravimetric analysis and dissolution experiment can be used to measure the loading amount. Firstly, measured the overall loading with the thermogravimetric analysis, then, according to the dissolution characteristics of internal loading (DI) and external loading (DO) , to determine the external loading (DO), and ultimately determine the internal loading (DI) [1, 2]. The loading amount of kanamycin on average per-nanoparticle be equal to overall loading divided by amount of hAuNPs.

#### Reference

1. Z. Z. Li, L. X. Wen, L. Shao and J. F. Chen, *Journal of Controlled Release*, 2004, **98**, 245-254.
2. Z. Z. Li, S. A. Xu, L. X. Wen, F. Liu, A. Q. Liu, Q. Wang, H. Y. Sun, W. Yu and J. F. Chen, *Journal of Controlled Release*, 2006, **111**, 81-88.

The release behaviors of kanamycin without and with laser irradiation (200 mW/cm<sup>2</sup>, diameter 2 mm, 30 min).

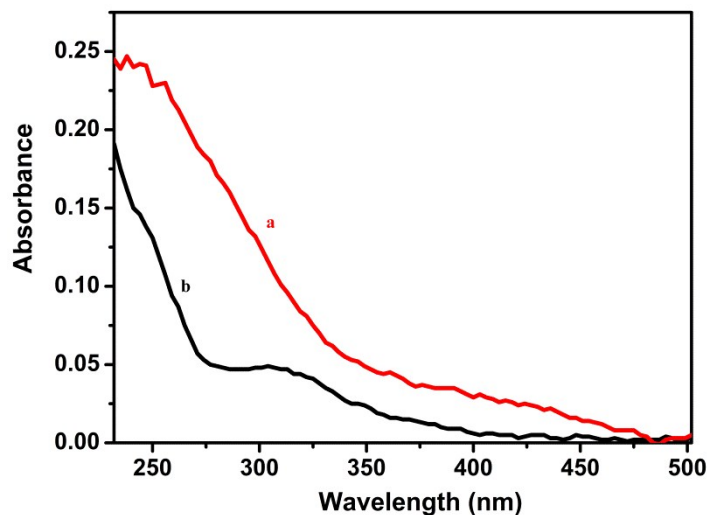

Kanamycin solution (1 mg/mL) was mixed with hAuNPs (0.5 mmol/L). The mixture was gently shaken at room temperature for 24 h in the dark. Free kanamycin was removed by centrifugation. The resulting hAuNPs-kana was placed in distilled water for 30 minutes, and the kanamycin (with laser: curve a and without laser: curve b) in suspension of the hAuNPs-kana was measured.

As shown above (256nm), the content of kanamycin with laser irradiation in the suspension was higher than that without. The results showed that laser irradiation promoted the release of kanamycin.

**The control groups of hAuNPs with and without anti-E.coli for evaluating the targeting effect.**

Schematic illustration of hAuNPs with and without anti-E.coli for evaluating the targeting effect.

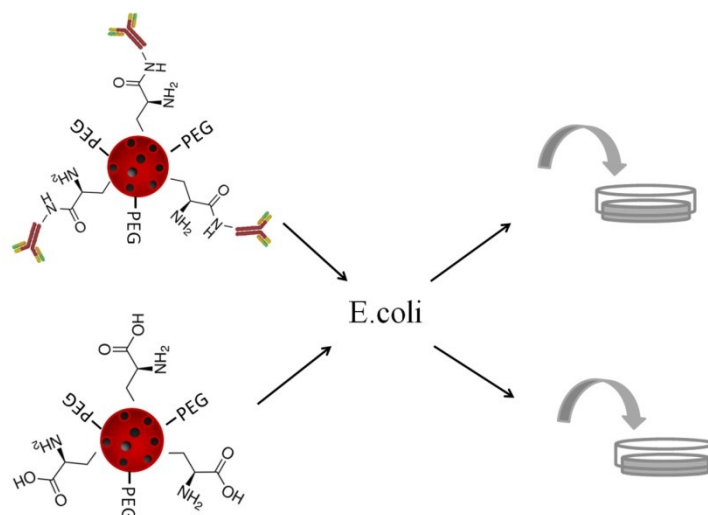

**Experimental**

Preparation of hAuNPs-anti-E.coli was the same as the experimental section in the manuscript, and the control group (the group of hAuNPs without anti-E.coli) eliminated the addition of antibody. To evaluate the targeting effect of the hAuNPs-anti-E.coli, E.coli (0.5 MCF) were diluted with broth to  $1 \times 10^5$  cfu/mL, and stored as original bacteria solution. The as-prepared E.coli solution (50  $\mu$ L) mixed with hAuNPs-anti-E.coli (30  $\mu$ L) was shaken for 2 h at room temperature. After being collected by centrifugation (5000 rpm/s, 15 min, 4  $^{\circ}$ C), the mixture was diluted with LB broth to 500  $\mu$ L. The bacteria above solution of 100  $\mu$ L was coated on the LB solid medium (parallel three), and the number of bacteria colonies were counted after 37  $^{\circ}$ C culture of 16 h. The experimental procedure of the control group was the same as above, but E.coli mixed with hAuNPs modified with double-ligand only.

## Results

The survival rate of *E. coli* in the presence of hAuNPs with and without anti-*E. coli*. (hAuNPs 2.0 mM)

|                        | Bacteria (blank)                                                                  | hAuNPs with anti- <i>E. coli</i>                                                  | hAuNPs without anti- <i>E. coli</i>                                                 |
|------------------------|-----------------------------------------------------------------------------------|-----------------------------------------------------------------------------------|-------------------------------------------------------------------------------------|
| Bacteria Viability (%) | 100.00±2.70                                                                       | 70.26±2.15                                                                        | 86.42±2.13                                                                          |
| Colony Images          | 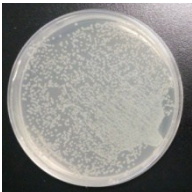 |  |  |

Under the same conditions, the bacteria viability of hAuNPs with anti-*E. coli* was lower than without. Because of the anti-*E. coli* mediated, there were more hAuNPs connected to *E. coli*, high concentration of hAuNPs led to a certain degree of bacterial death. This result indicating the targeting effects of the hAuNPs-anti-*E. coli*.
